# Supplementary material for: Opening pathways for the conversion of woody biomass into sustainable aviation fuel via catalytic fast pyrolysis and hydrotreating
Source: Royal Society of Chemistry journal article supplement (doi:10.1039/d4gc03333g), 2024-01-01
Supplement: d4gc03333g1.pdf [file d4gc03333g1.pdf]

## Supporting Information

### Opening pathways for the conversion of woody biomass into sustainable aviation fuel via catalytic fast pyrolysis and hydrotreating

Michael B. Griffin\*<sup>a</sup>, Kristiina Iisa<sup>a</sup>, Abhijit Dutta<sup>a</sup>, Xiaolin Chen<sup>a</sup>, Cody Wrasman<sup>a</sup>, Calvin Mukarakate<sup>a</sup>, Matthew M. Yung<sup>a</sup>, Mark R. Nimlos<sup>a</sup>, Luke Tuxworth<sup>b</sup>, Xavier Bauchere<sup>b</sup>, Steven M. Rowland<sup>a</sup>, Susan E. Habas<sup>a</sup>

| Table S1. Compositional analysis of the biomass feedstock |       |
|-----------------------------------------------------------|-------|
| C, wt%                                                    | 49.4% |
| H, wt%                                                    | 6.1%  |
| N, wt%                                                    | 0.2%  |
| Ash, wt%                                                  | 1.0%  |
| H <sub>2</sub> O, wt%                                     | 3.3%  |
| O by difference, wt%                                      | 43.3% |
| O dry basis, wt%                                          | 41.8% |

| Table S2. Carbon yields of gases produced during CFP<br>gC/gC in biomass x 100% |          |          |
|---------------------------------------------------------------------------------|----------|----------|
|                                                                                 | 17-O CFP | 20-O CFP |
| CO                                                                              | 11.9     | 12.8     |
| CO <sub>2</sub>                                                                 | 4.9      | 4.6      |
| CH <sub>4</sub>                                                                 | 2.8      | 2.4      |
| Ethene                                                                          | 2.7      | 2.2      |
| Propene                                                                         | 2.3      | 1.9      |
| Butenes                                                                         | 0.7      | 0.8      |
| Ethane                                                                          | 0.2      | 0.2      |
| Propane                                                                         | 0.4      | 0.3      |
| Total                                                                           | 25.8     | 25.1     |

| Table S3. Compositional analysis of CFP-oils by GC-MS, wt% |          |          |
|------------------------------------------------------------|----------|----------|
|                                                            | 17-O CFP | 20-O CFP |
| Aromatic hydrocarbons                                      | 14.1     | 7.9      |
| Phenols (monofunctional)                                   | 3.3      | 2.6      |
| Benzenediols                                               | 0        | 0        |
| Methoxyphenols                                             | 3.2      | 3.7      |
| Naphthols/Indenols                                         | 0.8      | 0.6      |
| Ketones                                                    | 1.3      | 1.7      |
| Aldehydes                                                  | 0.4      | 1.1      |
| Furans                                                     | 0.3      | 0.6      |
| Acids                                                      | 0.2      | 0.4      |
| Anhydrosugars                                              | 1.9      | 2.9      |
| Total                                                      | 25.5     | 21.6     |

| Table S4. Characterization of Pre-Reaction, Post-Reaction, and Regenerated ZSM-5 Catalysts |  |
|--------------------------------------------------------------------------------------------|--|
|--------------------------------------------------------------------------------------------|--|

|               | Surface Area,<br>m <sup>2</sup> /g | Acid Site Density,<br>μmol NH <sub>3</sub> /g |
|---------------|------------------------------------|-----------------------------------------------|
| Pre-Reaction  | 340                                | 765                                           |
| Post-Reaction | 85                                 | 516                                           |
| Regenerated   | 336                                | 722                                           |

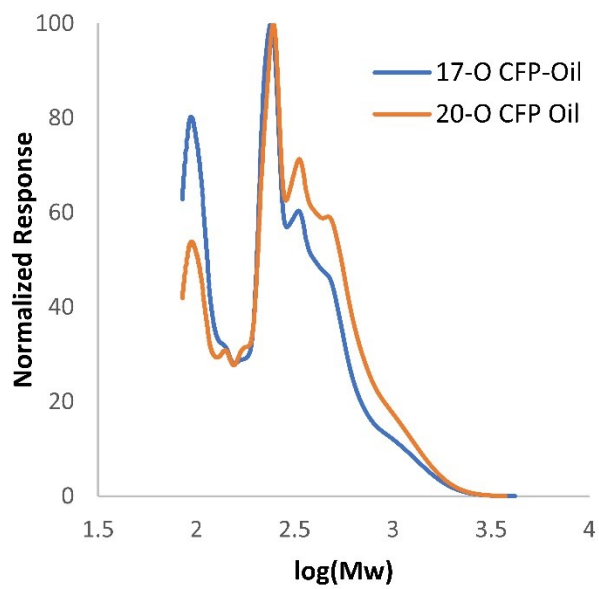

Figure S1. Gel permeation chromatography illustrating the comparatively low molecular weight distribution of the 17-O vs 20-O CFP-oils.

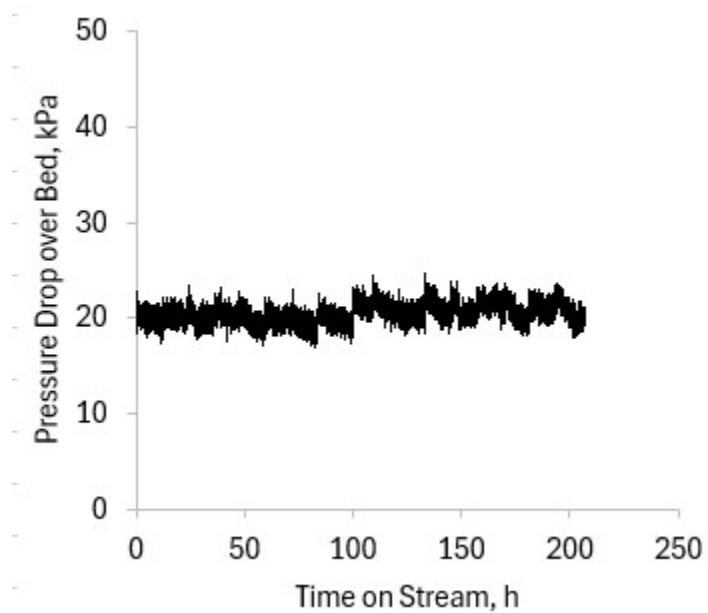

Figure S2. Measured pressure drop over the catalyst bed during hydrotreating of the 17-O CFP-oil

| Table S5. Mass yields of gases produced during hydrotreating,<br>g/g CFP-oil x 100% |          |          |
|-------------------------------------------------------------------------------------|----------|----------|
|                                                                                     | 17-O CFP | 20-O CFP |
| CO                                                                                  | 0        | 0        |
| CO <sub>2</sub>                                                                     | 0        | 0        |
| CH <sub>4</sub>                                                                     | 1.5      | 2.2      |
| C <sub>2</sub>                                                                      | 0.7      | 1.3      |
| C <sub>3</sub>                                                                      | 1.1      | 2.4      |
| C <sub>4</sub>                                                                      | 0.3      | 0.5      |
| C <sub>5</sub>                                                                      | 0.4      | 0.6      |

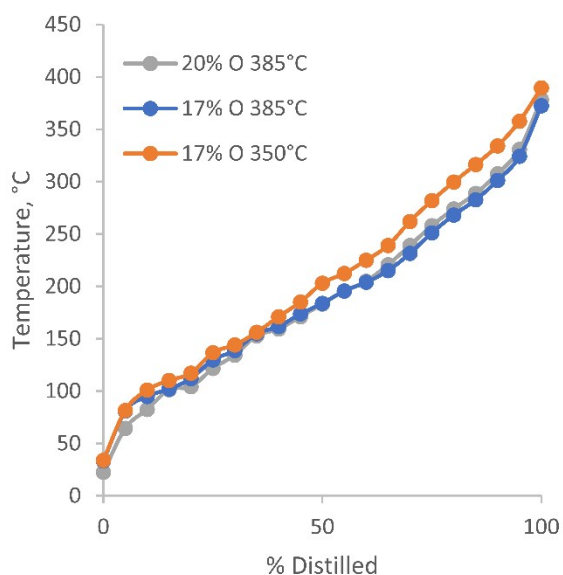

Figure S5. Simulated distillation (ASTM D2007) of 17-O and 20-O C<sub>15</sub>-oils hydrotreated at 385 and 350 °C.

| Table S6. Unit prices of key inputs* for TEA |        |       |           |
|----------------------------------------------|--------|-------|-----------|
|                                              | Unit   | Value | Cost Year |
| Feedstock (50 wt% pine /50 wt% residues)     | \$/dry |       |           |
|                                              | US ton | 67    | 2016      |
| CFP catalyst ‡                               | \$/lb  | 9.75  | 2011      |
| Hydrotreating Catalyst                       | \$/lb  | 20    | 2011      |

\*Other than feedstock, all assumptions are maintained from 2015 design report: <https://www.nrel.gov/docs/fy15osti/62455.pdf> .

‡ As in our other work, PPI industry sub-sector data for Chemical Manufacturing was used to update prices to 2016\$

§ A different catalyst unit cost can be prorated in the cost contribution tables to evaluate sensitivity to catalyst costs .

**Table S7. Total Capital Investment in 2016\$ (17-O base case)**

| <b>Process Area</b>                          | <b>Purchased Equip. Cost</b> | <b>Installed Cost</b> |
|----------------------------------------------|------------------------------|-----------------------|
| Area 100: Feed Handling & Drying             | \$300,000                    | \$580,000             |
| Area 200: Fast Pyrolysis & Vapor Upgrading   | \$64,240,000                 | \$179,200,000         |
| Area 300: Pyrolysis Vapor Quench             | \$6,210,000                  | \$11,410,000          |
| Area 400: Hydroprocessing and Separation     | \$22,680,000                 | \$36,040,000          |
| Area 500: Hydrogen Plant                     | \$24,760,000                 | \$50,060,000          |
| Area 600: Steam System and Power Generation  | \$40,820,000                 | \$73,760,000          |
| Area 700: Cooling Water and Other Utilities  | \$4,980,000                  | \$10,000,000          |
| Area 800: Water Management                   | \$8,400,000                  | \$19,850,000          |
| <b>Totals</b>                                | <b>\$172,390,000</b>         | <b>\$380,910,000</b>  |
| <b>Total Purchased Equipment Cost (TPEC)</b> |                              | <b>\$172,390,000</b>  |
| Installation Factor                          |                              | 2.210                 |
| <b>Total Installed Cost (TIC)</b>            |                              | <b>\$380,910,000</b>  |
| <b>Other Direct Costs</b>                    |                              |                       |
| Land (Not Depreciated)                       |                              | \$1,610,000           |
| Warehouse                                    | 4.0% of ISBL                 | \$9,090,000           |
| Site Development                             | 10.0% of ISBL                | \$22,720,000          |
| Additional Piping                            | 4.5% of ISBL                 | \$10,230,000          |
| <b>Total Direct Costs (TDC)</b>              |                              | <b>\$422,940,000</b>  |
| <b>Indirect Costs</b>                        | <b>% of TDC</b>              |                       |
| Prorated Expenses                            | 10.0%                        | \$42,290,000          |
| Home Office & Construction Fees              | 20.0%                        | \$84,590,000          |
| Field Expenses                               | 10.0%                        | \$42,290,000          |
| Project Contingency                          | 10.0%                        | \$42,290,000          |
| Other Costs (Start-Up & Permits)             | 10.0%                        | \$42,290,000          |
| <b>Total Indirect Costs</b>                  | <b>60.0%</b>                 | <b>\$253,770,000</b>  |
| <b>Fixed Capital Investment (FCI)</b>        |                              | <b>\$676,710,000</b>  |
| Working Capital                              | 5.0% of FCI (ex Land)        | \$33,840,000          |
| <b>Total Capital Investment (TCI)</b>        |                              | <b>\$710,550,000</b>  |

**Table S8. Total Capital Investment in 2016\$ (20-O base case)**

| <b>Process Area</b>                          |       | <b>Purchased Equip. Cost</b> | <b>Installed Cost</b> |
|----------------------------------------------|-------|------------------------------|-----------------------|
| Area 100: Feed Handling & Drying             |       | \$340,000                    | \$650,000             |
| Area 200: Fast Pyrolysis & Vapor Upgrading   |       | \$63,270,000                 | \$176,420,000         |
| Area 300: Pyrolysis Vapor Quench             |       | \$6,330,000                  | \$11,620,000          |
| Area 400: Hydroprocessing and Separation     |       | \$25,290,000                 | \$40,200,000          |
| Area 500: Hydrogen Plant                     |       | \$26,100,000                 | \$52,110,000          |
| Area 600: Steam System and Power Generation  |       | \$38,560,000                 | \$70,040,000          |
| Area 700: Cooling Water and Other Utilities  |       | \$4,890,000                  | \$9,900,000           |
| Area 800: Water Management                   |       | \$12,190,000                 | \$28,670,000          |
| <b>Totals</b>                                |       | <b>\$176,960,000</b>         | <b>\$389,610,000</b>  |
| <b>Total Purchased Equipment Cost (TPEC)</b> |       |                              | <b>\$176,960,000</b>  |
| Installation Factor                          |       |                              | 2.202                 |
| <b>Total Installed Cost (TIC)</b>            |       |                              | <b>\$389,610,000</b>  |
| <b>Other Direct Costs</b>                    |       |                              |                       |
| Land (Not Depreciated)                       |       |                              | \$1,610,000           |
| Warehouse                                    | 4.0%  | of ISBL                      | \$9,160,000           |
| Site Development                             | 10.0% | of ISBL                      | \$22,890,000          |
| Additional Piping                            | 4.5%  | of ISBL                      | \$10,300,000          |
| <b>Total Direct Costs (TDC)</b>              |       |                              | <b>\$431,960,000</b>  |
| <b>Indirect Costs</b>                        |       | <b>% of TDC</b>              |                       |
| Prorated Expenses                            |       | 10.0%                        | \$43,200,000          |
| Home Office & Construction Fees              |       | 20.0%                        | \$86,390,000          |
| Field Expenses                               |       | 10.0%                        | \$43,200,000          |
| Project Contingency                          |       | 10.0%                        | \$43,200,000          |
| Other Costs (Start-Up & Permits)             |       | 10.0%                        | \$43,200,000          |
| <b>Total Indirect Costs</b>                  |       | <b>60.0%</b>                 | <b>\$259,170,000</b>  |
| <b>Fixed Capital Investment (FCI)</b>        |       |                              | <b>\$691,130,000</b>  |
| Working Capital                              | 5.0%  | of FCI (ex Land)             | \$34,560,000          |
| <b>Total Capital Investment (TCI)</b>        |       |                              | <b>\$725,690,000</b>  |

**Table S9. Modeled Cost Contributions in 2016\$ (17-O base case)**

**cents/GGE**

|                                                                |              |
|----------------------------------------------------------------|--------------|
| Feedstock                                                      | 176.9        |
| Natural Gas                                                    | 0.1          |
| Catalysts*                                                     | 96.4         |
| Sand                                                           | 0.8          |
| Other Raw Materials                                            | 9.5          |
| Waste Disposal                                                 | 3.6          |
| Purchased Electricity                                          | 0.0          |
| Fixed Costs                                                    | 117.4        |
| Refinery Coprocessing Cost                                     | 0.0          |
| Electricity Coproduct Credit                                   | -73.0        |
| Capital Depreciation                                           | 124.3        |
| Average Income Tax                                             | 26.1         |
| Average Return on Investment                                   | 186.4        |
| <b>Total</b>                                                   | <b>668.6</b> |
| * Modeled CFP catalyst contribution = 68.4 cents/GGE           |              |
| * Modeled hydrotreating catalyst contribution = 27.2 cents/GGE |              |

| <b>Table S10. Modeled Cost Contributions in 2016\$ (20-O base case)</b> | <b>cents/GGE</b> |
|-------------------------------------------------------------------------|------------------|
| Feedstock                                                               | 156.6            |
| Natural Gas                                                             | 0.2              |
| Catalysts*                                                              | 89.4             |
| Sand                                                                    | 0.7              |
| Other Raw Materials                                                     | 8.5              |
| Waste Disposal                                                          | 3.3              |
| Purchased Electricity                                                   | 0.0              |
| Fixed Costs                                                             | 105.6            |
| Refinery Coprocessing Cost                                              | 0.0              |
| Electricity Coproduct Credit                                            | -53.9            |
| Capital Depreciation                                                    | 112.4            |
| Average Income Tax                                                      | 23.5             |
| Average Return on Investment                                            | 168.7            |
| <b>Total</b>                                                            | <b>615.0</b>     |
| * Modeled CFP catalyst contribution = 60.6 cents/GGE                    |                  |
| * Modeled hydrotreating catalyst contribution = 28.1 cents/GGE          |                  |

**Table S11. Breakdown of GHG Emissions (17-O base case)**

| <b>Operation</b>                    | <b>Emissions (g CO<sub>2</sub>e/MJ)</b> |
|-------------------------------------|-----------------------------------------|
| Forest residue processing           | 3.7                                     |
| Forest residue transportation       | 2.8                                     |
| Receiving handling and storage      | 0.3                                     |
| Forest residue preprocessing        | 13.2                                    |
| Pine collection                     | 8.5                                     |
| Pine processing                     | 0.3                                     |
| Pine transportation                 | 1.6                                     |
| Pine handling and storage           | 0.1                                     |
| Pine preprocessing                  | 15.5                                    |
| Fuel production                     | -40.0                                   |
| Fuel combustion                     | 1.1                                     |
| <b>Total</b>                        | <b>7.0</b>                              |
| Petroleum Jet Fuel (PJF) incumbent  | 88.7                                    |
| GHG reduction compared to incumbent | 92%                                     |

| <b>Table S12. Breakdown of GHG Emissions (20-O base case)</b> |                                         |
|---------------------------------------------------------------|-----------------------------------------|
| <b>Operation</b>                                              | <b>Emissions (g CO<sub>2</sub>e/MJ)</b> |
| Forest residue processing                                     | 3.3                                     |
| Forest residue transportation                                 | 2.4                                     |
| Receiving handling and storage                                | 0.2                                     |
| Forest residue preprocessing                                  | 11.7                                    |
| Pine collection                                               | 7.5                                     |
| Pine processing                                               | 0.3                                     |
| Pine transportation                                           | 1.4                                     |
| Pine handling and storage                                     | 0.1                                     |
| Pine preprocessing                                            | 13.7                                    |
| Fuel production                                               | -28.4                                   |
| Fuel combustion                                               | 1.1                                     |
| <b>Total</b>                                                  | <b>13.3</b>                             |
| Petroleum Jet Fuel (PJF) incumbent                            | 88.7                                    |
| GHG reduction compared to incumbent                           | 85%                                     |
